# Supplementary material for: Kinetic modeling of stem cell transcriptome dynamics to identify regulatory modules of normal and disturbed neuroectodermal differentiation
Source: PubMed Central journal article supplement — Nucleic Acids Res. 2020 Nov 27;48(22):12577–92. doi: 10.1093/nar/gkaa1089 (PMC7736781; doi:10.1093/nar/gkaa1089), 2020-11-27
Supplement: gkaa1089_supplemental_file.pdf [file gkaa1089_supplemental_file.pdf]

# **Kinetic modeling of stem cell transcriptome dynamics to identify regulatory modules of normal and disturbed neuroectodermal differentiation**

*Johannes Meisig\*, Nadine Dreser\*, Marion Kapitza, Margit Henry, Tamara Rotshteyn, Jörg Rahnenführer, Jan G. Hengstler, Agapios Sachinidis, Tanja Waldmann, Marcel Leist# and Nils Blüthgen#*  
\*,# shared first/ last author

## Table of contents

### ***Supplementary Figures***

- S1** Primary antibodies used for the study
- S2** Primer background information
- S3** Wnt signaling and its consequences in the STOP-tox<sub>(UKN)</sub> assay
- S4** Attenuation of neural crest differentiation by the Wnt pathway inhibitor ICRT3
- S5** Rescue from toxicant-induced neural crest formation by the beta-catenin inhibitor ICRT3
- S6** Example of the profile likelihood analysis
- S7** Parameter confidence intervals vs. peak time
- S8** Peak time confidence intervals
- S9** Significance of amplitude shift
- S10** Significance of peak time shift
- S11** Fold change triggered by VPA for TGF $\beta$  pathway genes

### ***Supplementary Texts***

- S1** Mathematical model of multi-state differentiation
- S2** Analytical gradient
- S3** Profile Likelihood

### ***Supplementary Table***

- S1** Table of Wnt targets

| Antibody ( $\alpha$ ) | Host       | Supplier                   | Order number | Dilution | Marker/usage          |
|-----------------------|------------|----------------------------|--------------|----------|-----------------------|
| ZO1                   | Mouse IgG1 | Invitrogen                 | 339100       | 1:400    | Rosette visualisation |
| GM130                 | Rabbit     | Abcam                      | ab52649      | 1:400    | Rosette visualisation |
| ISL1                  | Goat       | Abcam                      | Ab109517     | 1:200    | Neural crest          |
| p75                   | Mouse IgG1 | Advanced targeting systems | AB-N07       | 1:200    | Neural crest          |
| SOX10                 | Goat       | Santa Cruz                 | sc-17342     | 1:500    | Neural crest          |

**Supplementary figure S1: Primary antibodies that were used for the study.**

**A**

| Primer  | Marker for   | Tested at   | Forward seq                 | Reverse seq                 | Efficiency |
|---------|--------------|-------------|-----------------------------|-----------------------------|------------|
| NANOG   | UKN1 diff.   | DoD6        | GGTGAAGACCTGGTTCCAGAAC      | CATCCCTGGTGGTAGGAAGAGTAAAG  | 1.99       |
| POU5F1B | UKN1 diff.   | DoD6        | GCAAAGCAGAAACCTCGTGC        | ACACTGGACCACATCCTTCTCG      | 2.12       |
| PAX6    | UKN1 diff.   | DoD6        | CCGCCTATGCCAGCTTAC          | AAGTGGTGCCCGAGGTGCC         | 2.05       |
| OTX2    | UKN1 diff.   | DoD6        | GTTCAGAGTCTTGGTGGGT         | CCCTCACTCGCCACATCTAC        | 2.22       |
| MSX1    | Neural crest | DoD6        | GGATCAGACTTCGGAGAGTGAAC     | GCCTTCCCTTAAACCCTCACA       | 1,96       |
| TFAP2B  | Neural crest | DoD6        | GGGGAGATCTTTCGAGAAAAGG      | CTGTGTGCTGCCGGTTCAAATA      | 1.98       |
| SNAI2   | Neural crest | DoD6        | CGCGCTCCTTCTGGTCAAG         | CATTGGGTAGCTGCTGGGCGTGG     | 2.04       |
| PAX3    | Neural crest | DoD6        | GACTGGCTCCATACGCTCTGGTGC    | CGGCTGATGGAAGTCACTGACGG     | 2.08       |
| GAD1    | Wnt          | DoD3        | TTC TCT TCC AGG CTG TTG GT  | CAA TAC CAC TAA CCT GCG CC  | 2.09       |
| SP5     | Wnt          | DoD3        | GGA CTT TGC GCA GTA CCA GAG | TGC GAC GTC TTC CCG TAC ACC | 2.04       |
| DACT    | Wnt          | DoD3        | TGAGCTGAGTGATGGGGCTTCAGG    | CTGAGGCCTGGTCTTACAGTGGC     | 2,14       |
| SIX3    | Wnt          | DoD3        | CAA GAA CAG GCT CCA GCA C   | GTG GAC GGC GAC TCT GC      | 2.10       |
| RPL13A  | Reference    |             | CCTGGAGGAGAAGAGGAAAGAGA     | TTGAGGACCTCTGTGATTTGTCAA    | 2.01       |
| TBP     | Reference    |             | GGGCACCACTCCACTGTATC        | GCAGCAAACCGCTTGGATTATATTCG  | 2.02       |
| DAZL    | Model fit    | Time course | TGATCCAGGAGCTGAAGTTGTGCCAA  | GCCCGACTTCTTCTAAAGTGATGCAC  | 2.01       |
| BMP5    | Model fit    | Time course | ATCTCGGACGACTCCTCTGAC       | GCTGTCAGTGCCTCTCCATGA       | 1.97       |
| SOX9    | Model fit    | Time course | AGGAAGCTCGCGGACCAGTA        | CTGCCCGTTCTTACCGACT         | 1.99       |
| POU4F1  | Model fit    | Time course | CGG CTT GAA AGG ATG GCT CTT | CCC TGA GCA CAA GTA CCC GTC | 2,07       |
| NPY     | Model fit    | Time course | GCGTACCCCTCCAAGCCGGACAAC    | CAGGGTCTTCAAGCCGAGTTCTGG    | 1.95       |
| OLFM3   | Model fit    | Time course | GGCGGTGCATTTGCACAGTTGTTG    | GCCGAAATTTGCCTTACGCCCTT     | 1.92       |
| PIPOX   | Model fit    | Time course | GGAAGCTCCCATGGACAAAGCCGG    | GCCTCGACAGATTGGCTGGATTG     | 2.05       |

**B**

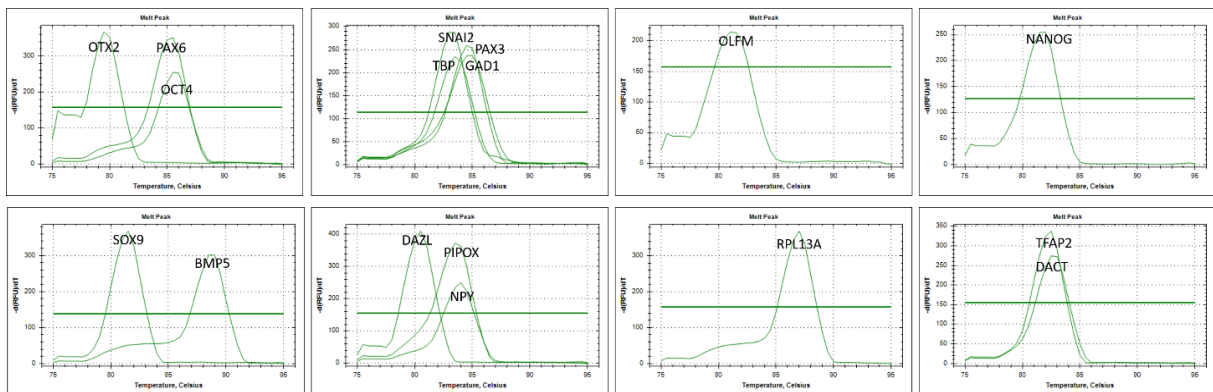

**C**

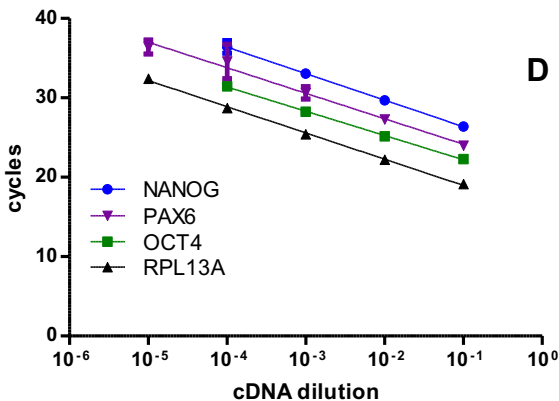

**D**

|                 | NANOG  | OCT4   | RPL13A | PAX6   |
|-----------------|--------|--------|--------|--------|
| 1/Slope         | -0.299 | -0.327 | -0.303 | -0.311 |
| Efficiency      | 1.99   | 2.124  | 2.007  | 2.047  |
| Efficiency in % | 99     | 112    | 101    | 105    |
| R <sup>2</sup>  | 0.990  | 0.998  | 0.998  | 0.961  |

**Supplementary figure S2: Primer background information.**

(A) PCR Primers that were used for the study. (B) Melting curves of the PCR products. The x-axis always indicates the temperature range from 75°C to 96°C. Notably, qPCR products were additionally analysed on their correct length by gel electrophoresis. Occurrence of other products was excluded. (C) Standard dilution curves for major primers used for this study. (D) Primer efficiency was calculated based on the slope of standard curves.

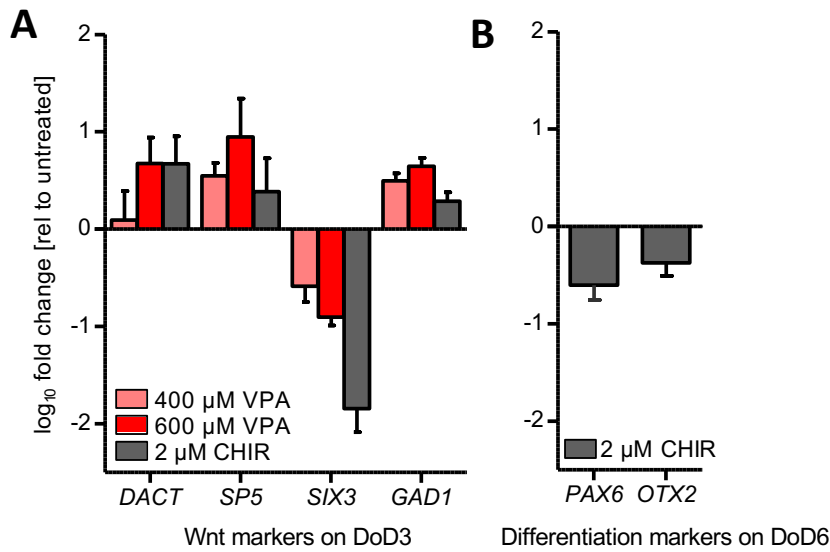

**Supplementary figure S3: Wnt signaling and its consequences in the STOP-tox(UKN) assay.** (A) Cells were differentiated until DoD3 using the standard STOP-tox(UKN) assay protocol (= untreated controls), or they were exposed during the differentiation to valproic acid (VPA) or the Wnt activator CHIR. Then, cells were lysed, the mRNA was isolated, and the expression of the Wnt marker genes DACT, SP5, SIX3 and GAD1 was investigated (reverse transcription real-time PCR). Data are means  $\pm$  SD from three experiments. (B) Cells were differentiated as in A, but until DoD6. They were left otherwise untreated (control) or exposed to CHIR from DoD0-DoD6. Then, gene expression of the standard STOP-tox(UKN) assay endpoints PAX6 and OTX2 was measured by PCR. Data (means  $\pm$  SD, n = 3) is depicted relative to the untreated control. The data confirm previous findings (8) that Wnt activation affects the assay outcome.

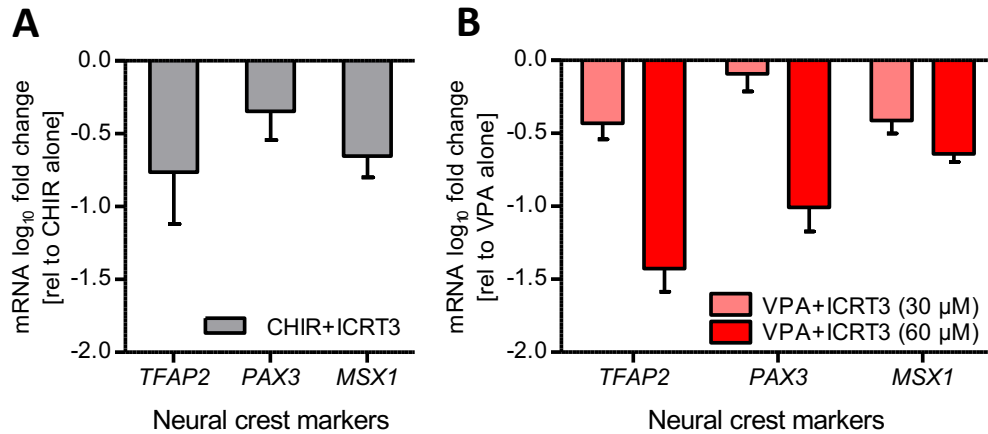

**Supplementary figure S4: Attenuation of neural crest differentiation by the Wnt pathway inhibitor ICRT3.** Cells were differentiated until DoD6 using the standard STOP-tox(UKN) assay protocol, modified by the addition of CHIR (2 μM) or VPA (400 μM), two toxicants shifting the differentiation from the neuroepithelial lineage towards neural crest (8,9). On DoD6, the expression of marker genes was analyzed by PCR. (A) Cells were treated with CHIR alone, or the beta-catenin inhibitor ICRT3 (60μM) was added in addition from DoD2-6. The expression of the neural crest marker genes TFAP2, PAX3 and MSX1 was investigated, and data are indicated as CHIR+ICRT3 vs CHIR alone. Negative numbers on the abscissa indicate a relative downregulation (= attenuation of the CHIR effect) by ICRT3. (B) Cells were treated with VPA alone, or the beta-catenin inhibitor ICRT3 (30 μM and 60μM) was added in addition from DoD2-6. The expression of the neural crest marker genes TFAP2, PAX3 and MSX1 was investigated, and data are indicated as VPA+ICRT3 vs VPA alone. Negative numbers on the abscissa indicate a relative downregulation (= attenuation of the VPA effect) by ICRT3. All data are means ± SD, n=3.

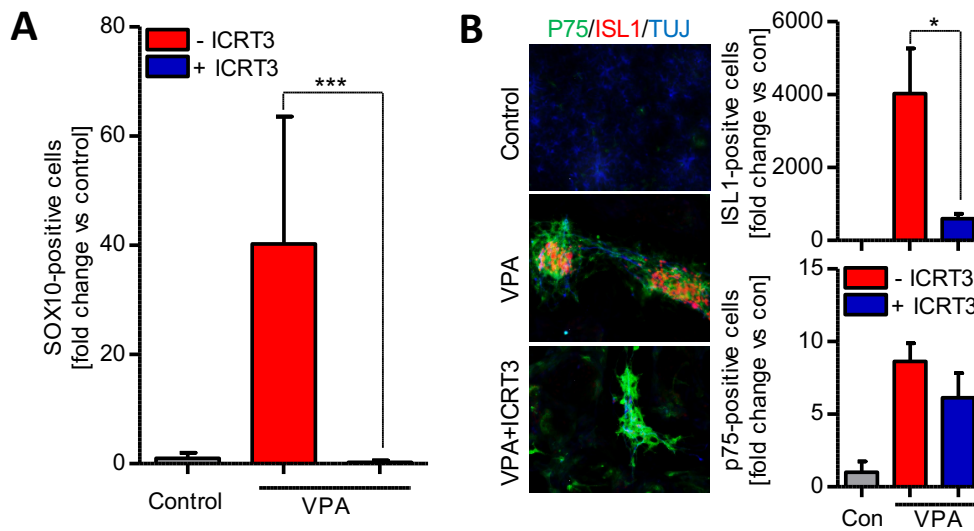

**Supplementary figure S5: Rescue from toxicant-induced neural crest formation by the beta-catenin inhibitor ICRT3.** (A) Pluripotent stem cells were differentiated until DoD6, and exposed to solvent or valproic acid (VPA, 600  $\mu$ M) from DoD0-DoD6. They were co-treated or not with ICRT3 (beta-catenin inhibitor; 60  $\mu$ M) from DoD2-DoD6. Then, SOX10 protein was immunostained, and the number of positive cells was quantified (SOX10 positive pixels were counted automatically and they were normalized to the nuclear area, as identified by H-33342 staining). Data are means  $\pm$  SD; n=3. The untreated control (Con; differentiation without toxicants or inhibitors) is used as reference to calculate fold-changes of treated cells. (B) Pluripotent stem cells were differentiated until DoD15, and exposed to valproic acid (VPA, 600  $\mu$ M) from DoD0-DoD6. They were co-treated with ICRT3 from DoD2-DoD6. On DoD15, cells were fixed and immunostained for ISL1 and p75 (the low affinity nerve growth factor receptor NGFR, aliases: TNFRSF16, CD271, p75NTR). The number of positive cells was quantified as in A in 7-16 wells. Data are means  $\pm$  SD. Data is shown relative to untreated control (Con).

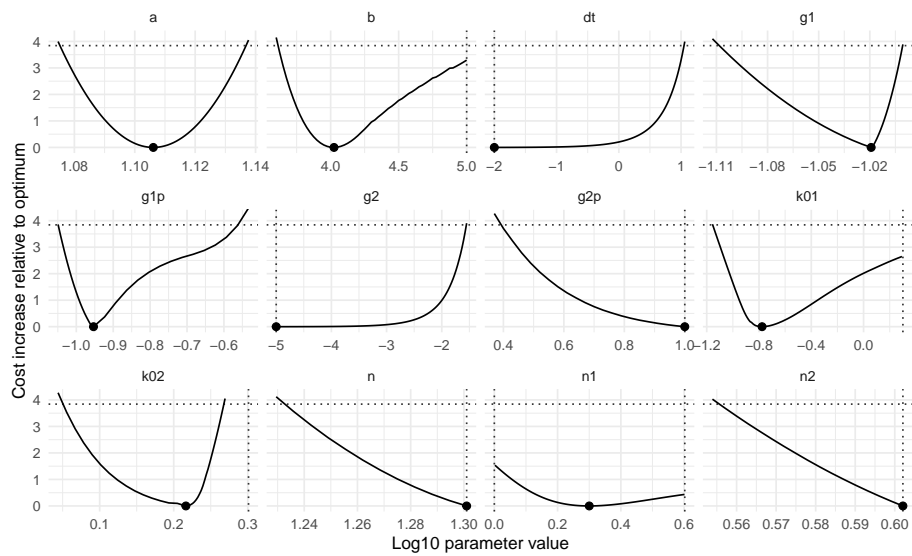

**Supplementary Figure S6:** Example of the profile likelihood analysis for the gene POU4F1 using the L-BFGS-B optimization algorithm. For each parameter, the cost difference to the minimal cost is plotted against the parameter value.

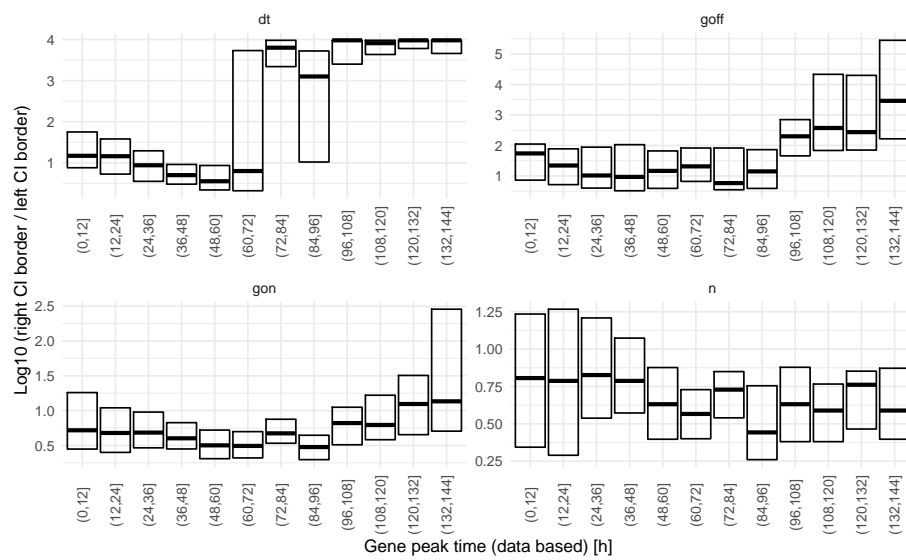

**Supplementary Figure S7:** Box plots showing the distribution of the parameter confidence intervals for the parameters  $g_{on}$ ,  $g_{off}$ ,  $n$  and  $dt$ . Genes peaking later than 0 h or earlier than 144 h were binned by their peak time into 12 hour intervals based on the data (interpolated using loess with span 0.8 to a resolution of 0.1 h) and the 25%, 50% and 75% quantiles of the  $\text{Log}_{10}$  ratio of the upper and lower confidence interval boundary were computed in each bin. Boxes indicate the interquartile distribution, horizontal bars the median.



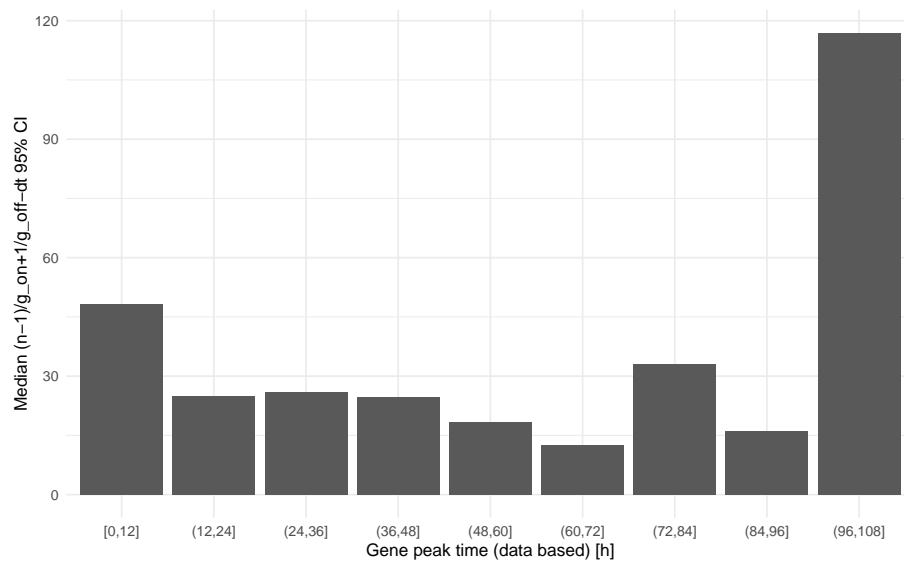

**Supplementary Figure S8:** Median confidence interval for the peak time approximated by  $(n-1)/g_{\text{on}} + 1/g_{\text{off}} - dt$  according to Eq. (11). Genes were binned into 12 hour intervals as in Fig. S7 and the median confidence interval for the peak time as a function of the parameters  $g_{\text{on}}$ ,  $g_{\text{off}}$ ,  $n$  and  $dt$  was computed in each bin. Bins for genes peaking later than 108 h were excluded and only genes peaking later than 0 h were included.

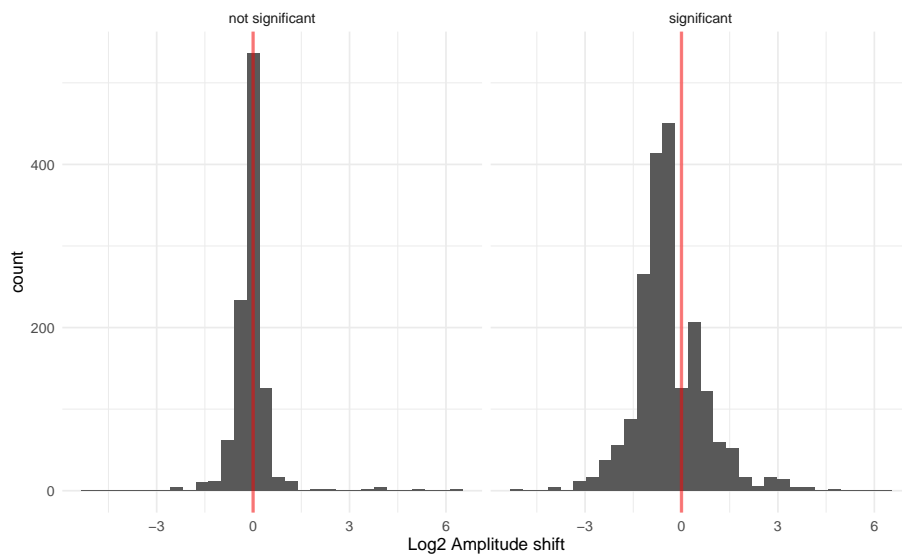

**Supplementary Figure S9:** Distribution of genes with respect to the amplitude shift triggered by 0.6 mM VPA compared to the untreated differentiation for genes with and without significant shift. Only genes with an amplitude shift confidence interval excluding zero are considered significant.

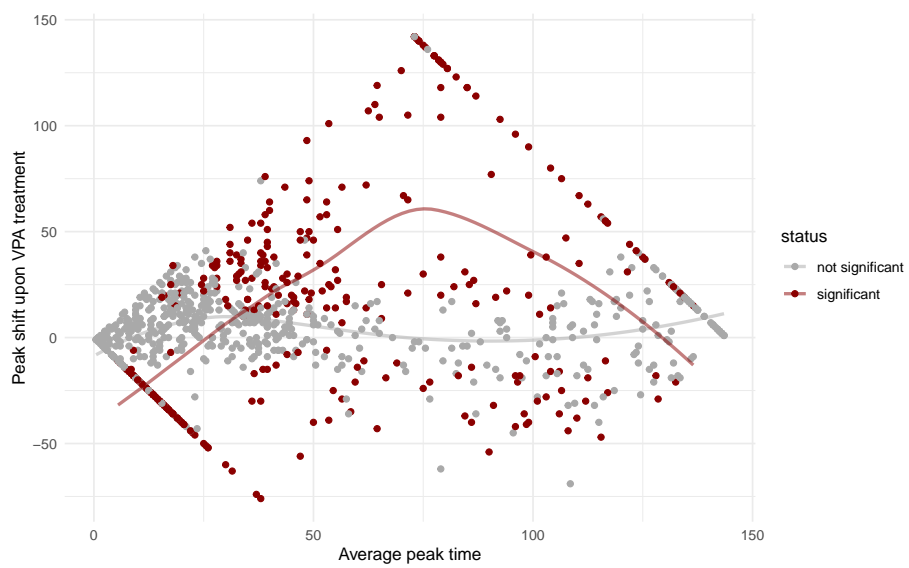

**Supplementary Figure S10:** MA-plot for the change in peak time triggered by 0.6 mM VPA compared to the untreated differentiation. For each gene that peaks later than 0 h and earlier than 144 h in the fit to the untreated data, the change in peak time is plotted against the mean of the peak time in the treated and untreated conditions. Genes with a peak time shift confidence interval excluding zero are marked in red. Lines indicate a loess interpolation with span 0.75.

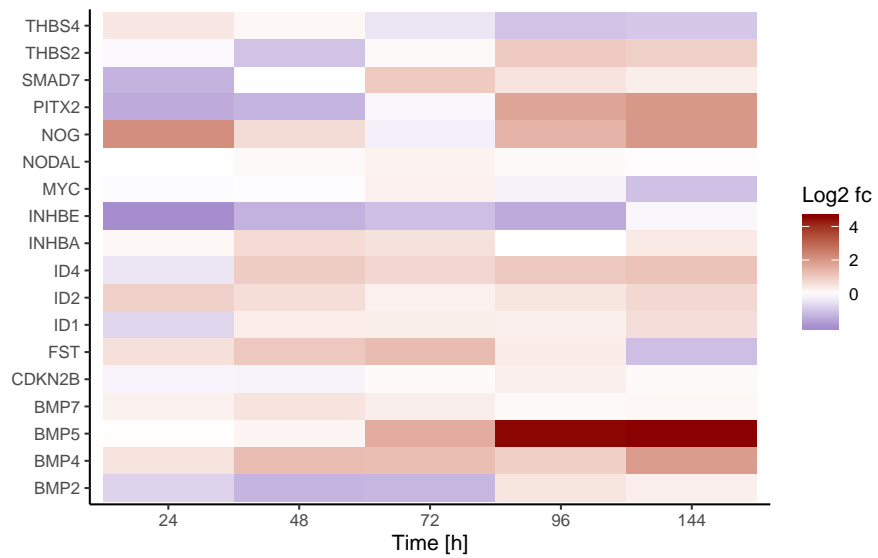

**Supplementary Figure S11:** The fold change between cells treated with 0.6 mM VPA and untreated cells is shown as a heatmap for TGFβ pathway genes at the indicated time points.

## Supplementary Text S1 Mathematical model of multi-state differentiation

The multi-state kinetic model can be described by the Bateman equation (Bateman, 1910) originally formulated for radioactive decay chains. We will use the special case where an intermediate state  $n$  is preceded by  $n - 1$  states with transition rate  $g_{on}$  and decays with rate  $g_{off}$ . In this case the differential equation is

$$\frac{\partial p_0}{\partial t} = -g_{on}p_0 \quad (1)$$

$$\frac{\partial p_1}{\partial t} = g_{on}p_0 - g_{on}p_1 \quad (2)$$

$$\dots \quad \dots \quad (3)$$

$$\frac{\partial p_n}{\partial t} = g_{on}p_{n-1} - g_{off}p_n \quad (4)$$

For  $n \geq 1$  and  $p_0(0) = 1$  we have the solution (Ritter et al., 2003)

$$p_n = e^{-g_{off}t} \left( \frac{g_{on}}{g_{on} - g_{off}} \right)^n \left( 1 - \frac{\Gamma(n, t(g_{on} - g_{off}))}{\Gamma(n)} \right), \quad (5)$$

with  $\Gamma(n)$  the gamma function and  $\Gamma(n, x)$  the upper incomplete gamma function. The upper incomplete gamma function can be replaced by the lower incomplete gamma function  $\gamma(n, x)$  according to

$$1 - \frac{\Gamma(n, x)}{\Gamma(n)} = \frac{\gamma(n, x)}{\Gamma(n)} = \frac{n^{-1}x^n M(n, 1 + n, -x)}{\Gamma(n)}. \quad (6)$$

The last step used a relationship between the gamma function and the confluent hypergeometric function found in Abramowitz and Stegun (1964) as equation 6.5.12. Plugging (6) into (5), we obtain

$$p_n = \frac{e^{-g_{off}t} g_{on}^n t^n M(n, 1 + n, -(g_{on} - g_{off})t)}{\Gamma(n + 1)}, \quad (7)$$

where  $n\Gamma(n) = \Gamma(n + 1)$  has been used. For  $g_{off} \gg g_{on}$  the confluent hypergeometric function  $M(n, 1 + n, -(g_{on} - g_{off})t)$  becomes too large for standard machine size numbers. Using Kummer's transformation  $M(a, b, x) = e^x M(b - a, b, -x)$  (Abramowitz and Stegun (1964), 13.1.14), we can avoid this problem by taking

$$p_n = \frac{e^{-g_{on}t} g_{on}^n t^n M(n, 1 + n, (g_{on} - g_{off})t)}{\Gamma(n + 1)} \quad (8)$$

instead of (7) for  $g_{off} > g_{on}$ . The confluent hypergeometric function  $M(a, b, x)$  is implemented as `hyperg_1F1(a, b, x)` in the GNU scientific library which is available

through the R package `gs1`. As every term in our solution is defined for real positive  $n$ , we do not need to restrict ourselves to integer number of steps.

If  $g_{\text{off}}$  is large, the rather complicated solution for  $p_n$  can be formulated in terms of  $p_{n-1}$ , which helps to find the time where the maximum occurs. More precisely, Ritter et al. (2003) show that

$$\lim_{g_{\text{off}} \rightarrow \infty} g_{\text{off}} p_n = g_{\text{on}} p_{n-1}. \quad (9)$$

With the equal transition rate solution for the Bateman equations,

$$p_{n-1} = \frac{1}{(n-1)!} e^{-g_{\text{on}} t} (g_{\text{on}} t)^{n-1}, \quad (10)$$

we can approximate the time of the maximum for  $p_n$  by the maximum of  $p_{n-1}$ ,  $t = (n-1)/g_{\text{on}}$ . If  $p_n$  is linearly extrapolated around  $t_{\text{max}} = (n-1)/g_{\text{on}}$ , the equation  $g_{\text{on}} p_{n-1}(t_{\text{max}}) = g_{\text{off}} p_n(t_{\text{max}} + \Delta t)$  is satisfied for  $\Delta t = 1/g_{\text{off}}$  (The linear expansion of  $p_{n-1}$  lacks the first order term because its evaluated at the maximum). It follows that the approximation of the maximum of  $p_n$  by the maximum of  $p_{n-1}$  is good for  $\frac{n-1}{g_{\text{on}}} \gg \frac{1}{g_{\text{off}}}$ . A better approximation that is valid for large  $g_{\text{off}}$  is

$$t_{\text{max}} = \frac{n-1}{g_{\text{on}}} + \frac{1}{g_{\text{off}}}. \quad (11)$$

## Supplementary Text S2 Analytical gradient

To improve optimizer performance at parameter values where the cost function is shallow, we implemented an analytical gradient for the cost function. We list the derivatives of (8) with respect to  $n$ ,  $t$ ,  $g_{\text{on}}$  and  $g_{\text{off}}$ .

$$\begin{aligned} \frac{d}{dn} p_n &= \frac{1}{n\Gamma(n)} \exp(-g_{\text{off}} t) \times \\ &\left(1 - \frac{g_{\text{off}}}{g_{\text{on}}}\right)^{-n} \left( -((g_{\text{on}} - g_{\text{off}})t)^n \text{HyperG}_{2F2}((n, n), (1+n, 1+n), (-g_{\text{on}} + g_{\text{off}})t) \right. \\ &\left. (\Gamma(1+n) - n\Gamma(n, (g_{\text{on}} - g_{\text{off}})t))(1 + \bar{\gamma}n - nH_n + n \log(g_{\text{on}}t)) \right), \end{aligned}$$

where  $\bar{\gamma}$  is the Euler-Mascheroni constant,  $H_n$  is the  $n$ -th harmonic number and  $\text{HyperG}_{2F2}$  is the generalized hypergeometric function  $2F2$ . Since we did not find an R-implementation of  $\text{HyperG}_{2F2}$  we used the integral representation Eq. (4.8.3.11) in Slater (1966):

$${}_2F_2((a, d), (b, c), x) = \frac{\Gamma(a)}{\Gamma(b) - \Gamma(a)} \int_0^1 {}_1F_1(d, c, xt) dt.$$

For  $t$ :

$$\frac{d}{dt} p_n = \frac{1}{t\Gamma(n)} \exp(-g_{\text{on}} t) g_{\text{on}}^n (g_{\text{on}} - g_{\text{off}})^{-n} \times \\ \left( ((g_{\text{on}} - g_{\text{off}})t)^n - \exp((g_{\text{on}} - g_{\text{off}})t) g_{\text{off}} t (\Gamma(n) - \Gamma(n, (g_{\text{on}} - g_{\text{off}})t)) \right).$$

For  $g_{\text{on}}$ :

$$\frac{d}{dg_{\text{on}}} p_n = \frac{1}{\Gamma(n)} \exp(-g_{\text{on}} t) g_{\text{on}}^{n-1} (g_{\text{on}} - g_{\text{off}})^{-n-1} \times \\ (g_{\text{on}} ((g_{\text{on}} - g_{\text{off}})t)^n - \exp((g_{\text{on}} - g_{\text{off}})t) g_{\text{off}} n (\Gamma(n) - \Gamma(n, (g_{\text{on}} - g_{\text{off}})t))).$$

For  $g_{\text{off}}$ :

$$\frac{d}{dg_{\text{off}}} p_n = \frac{1}{\Gamma(n)} \exp(-g_{\text{on}} t) g_{\text{on}}^n (g_{\text{on}} - g_{\text{off}})^{-n-1} \times \\ \left( -((g_{\text{on}} - g_{\text{off}})t)^n - \exp((g_{\text{on}} - g_{\text{off}})t) (n + (g_{\text{off}} - g_{\text{on}})t) (\Gamma(n) - \Gamma(n, (g_{\text{on}} - g_{\text{off}})t)) \right).$$

The full cost function is a sum over terms of the form

$$\frac{(y_i - \log_2(A + B p_n(t_i, h(c_i, g_{\text{on}}, g'_{\text{on}}, k_1, n_1), h(c_i, g_{\text{off}}, g'_{\text{off}}, k_2, n_2), n)))^2}{\sigma_i^2},$$

where  $t_i$ ,  $c_i$ ,  $y_i$  and  $\sigma_i$  are the time point, concentration, measured expression and standard deviation for one condition. Furthermore,  $h(c, g, g', k, n)$  is a Hill function of the form

$$g + (g - g') \frac{c^n}{c^n + k^n}.$$

Consequently, derivatives of the cost function have to be computed using the chain rule. We exemplify this for the parameter  $k_1$ .

$$-2 \frac{B(y_i - \log_2(A + B p_n))}{\sigma_i^2 (A + B p_n) \log(2)} \frac{d}{dg_{\text{on}}} p_n \frac{d}{dk} h(c, g_{\text{on}}, g_{\text{off}}, k_1, n_1),$$

where we omitted the arguments of  $p_n$  for brevity. Derivatives for all other parameters can be computed in a similar fashion.

## Supplementary Text S3 Profile Likelihood

To analyze parameter identifiability, we performed profile likelihood (PL) as described in Kreutz et al. (2013). First, optimal parameter sets were reoptimized using the L-BFGS-B method implemented in the optim function using parameters maxit=20000, fnscale=1e6, factr=1e2. This was done because PL results are quite

| Algorithm | Parameters                                                                   |
|-----------|------------------------------------------------------------------------------|
| LM        | $ftol=10^{-25}$ , $ptol=10^{-16}$ , $gtol=10^{-15}$ , $maxiter=2 \cdot 10^4$ |
| LBFGSB    | $fnscale=10^6$ , $fctr=10^2$ , $maxit=2 \cdot 10^4$                          |

**Table 1:** Parameters used for optimization.

sensitive to small deviations from the optimal parameter set. A fixed step size in log space of  $\frac{\log_{10}(u)-\log_{10}(l)}{200}$ , where  $u$  and  $l$  are the parameter upper and lower bounds, respectively, was chosen for the PL parameter. PL parameter values were increased/decreased by the fixed step size starting from the optimal value and all other parameters were reoptimized after each step. Computation of the costs after each step increase/decrease was terminated when the cost increase exceeded the 95%-quantile of the  $\chi^2$  distribution with one degree of freedom or if the parameter value exceeded the upper or lower bound. If termination occurred and less than 10 steps were performed, the step size was decreased until the parameter was increased and decreased from the optimum by at least 10 steps.

We observed that the results of the PL analysis vary strongly with the parameters supplied to the optimizer function. In particular, sometimes the optimizer oscillated between two similar local optima between PL steps. Because of this we decided to compute the PL with two different optimization algorithms to reduce the influence of the details of the optimization strategy on the parameter identifiability results. We used the parameters indicated in Tab. 1 for the optimization algorithms. For each gene and parameter, we used the largest PL interval predicted by any of the two procedures. Exemplary profile likelihood plots for the gene POU4F1 are shown in Fig. S6.

When a lower cost (minimal cost improvement 0.01) than the optimal cost obtained during fitting was encountered in the PL analysis, we reran the PL analysis starting from the parameter set corresponding to the lower cost value.

Finally, the best parameter set encountered for each gene during the initial fit or during the PL analysis was adopted as final parameter set and used to generate model predictions.

## References

- Abramowitz, M. and Stegun, I. A. (1964). *Handbook of Mathematical Functions: With Formulas, Graphs, and Mathematical Tables*. Courier Corporation. Google-Books-ID: MtU8uP7XMvoC.
- Bateman, H. (1910). The solution of a system of differential equations occurring in the theory of radioactive transformations. In *Proc. Cambridge Philos. Soc.*, volume 15, pages 423–427.



Kreutz, C., Raue, A., Kaschek, D., and Timmer, J. (2013). Profile likelihood in systems biology. *The FEBS Journal*, 280(11):2564–2571.

Ritter, G., Wilson, R., Pompei, F., and Burmistrov, D. (2003). The multistage model of cancer development: some implications. *Toxicology and Industrial Health*, 19(7-10):125–145.

Slater, L. J. (1966). *Generalized Hypergeometric Functions*. Cambridge University Press. Google-Books-ID: Hq0NAQAIAAJ.

## Supplementary Table S1 Wnt targets

| gene            | symbol  | z_value_wnt_induction |
|-----------------|---------|-----------------------|
| ENSG00000138083 | SIX3    | -16.1516627014814     |
| ENSG00000134595 | SOX3    | -10.315654290238      |
| ENSG00000163666 | HESX1   | -8.54100694986801     |
| ENSG00000181274 | FRAT2   | -8.02413276419602     |
| ENSG00000126010 | GRPR    | -7.05541558644029     |
| ENSG00000170955 | PRKCDBP | -6.98243425681697     |
| ENSG00000048545 | GUCA1A  | -6.25124030674909     |
| ENSG00000147257 | GPC3    | -6.19639113716754     |
| ENSG00000118513 | MYB     | -6.0877600645586      |
| ENSG00000118523 | CTGF    | -5.88648163315426     |
| ENSG00000113763 | UNC5A   | -5.88632390438663     |
| ENSG00000008311 | AASS    | -5.71180581054374     |
| ENSG00000178573 | MAF     | -5.5640485810582      |
| ENSG00000125378 | BMP4    | -5.44667351333135     |
| ENSG00000184302 | SIX6    | -5.37124241645972     |
| ENSG00000134207 | SYT6    | -5.33975536154076     |
| ENSG00000176788 | BASP1   | -5.28342300181845     |
| ENSG00000169764 | UGP2    | -5.2762105139029      |
| ENSG00000163251 | FZD5    | -5.2510067051812      |
| ENSG00000111913 | FAM65B  | -5.14287478722049     |
| ENSG00000050344 | NFE2L3  | -5.07012501898418     |
| ENSG00000141736 | ERBB2   | -5.05526267230371     |
| ENSG00000249992 | TMEM158 | -4.94758118436699     |
| ENSG00000163694 | RBM47   | -4.81438303928001     |
| ENSG00000076716 | GPC4    | -4.67079948358355     |
| ENSG00000111752 | PHC1    | -4.64599069647958     |
| ENSG00000162496 | DHRS3   | -4.58392112519483     |
| ENSG00000147601 | TERF1   | -4.46565814725689     |
| ENSG00000128610 | FEZF1   | -4.46534454951203     |
| ENSG00000154553 | PDLIM3  | -4.42266413987513     |
| ENSG00000142871 | CYR61   | -4.40940113486154     |
| ENSG00000141682 | PMAIP1  | -4.28944741034966     |
| ENSG00000179046 | TRIML2  | -4.28913581208809     |
| ENSG00000165029 | ABCA1   | -4.25418302886945     |
| ENSG00000140511 | HAPLN3  | -4.22415090943536     |
| ENSG00000118407 | FILIP1  | -4.19574953779071     |
| ENSG00000106829 | TLE4    | -4.17213934066303     |
| ENSG00000118946 | PCDH17  | -4.16753298419809     |
| ENSG00000135525 | MAP7    | -4.15601387750254     |
| ENSG00000077274 | CAPN6   | -4.01782484192113     |
| ENSG00000106538 | RARRES2 | -4.00565621277993     |
| ENSG00000102119 | EMD     | -3.97242570442417     |
| ENSG00000158321 | AUTS2   | -3.96290679687107     |
| ENSG00000154556 | SORBS2  | -3.96074103559565     |
| ENSG00000171608 | PIK3CD  | -3.95502181792838     |
| ENSG00000073712 | FERMT2  | -3.92033220959351     |
| ENSG00000134324 | LPIN1   | -3.88564019596438     |
| ENSG00000156475 | PPP2R2B | -3.8585950831058      |
| ENSG00000130751 | NPAS1   | -3.85682257182812     |

|                 |          |                   |
|-----------------|----------|-------------------|
| ENSG00000171246 | NPTX1    | -3.83797349974686 |
| ENSG00000035403 | VCL      | -3.72642899522194 |
| ENSG00000185885 | IFITM1   | -3.71290054866807 |
| ENSG00000146411 | SLC2A12  | -3.70055133364338 |
| ENSG00000140545 | MFGE8    | -3.69729614186889 |
| ENSG00000150687 | PRSS23   | -3.65305448075273 |
| ENSG00000100605 | ITPK1    | -3.65043054422015 |
| ENSG00000181885 | CLDN7    | -3.60015782261828 |
| ENSG00000116774 | OLFML3   | -3.58884789978521 |
| ENSG00000124839 | RAB17    | -3.5812186615456  |
| ENSG00000147676 | MAL2     | -3.57864737091821 |
| ENSG00000129654 | FOXJ1    | -3.55528028946606 |
| ENSG00000129116 | PALLD    | -3.53943467309711 |
| ENSG00000135248 | FAM71F1  | -3.50511379837745 |
| ENSG00000074410 | CA12     | 3.52258646667265  |
| ENSG00000136842 | TMOD1    | 3.52581091010396  |
| ENSG00000151692 | RNF144A  | 3.57292505103783  |
| ENSG00000165495 | PKNOX2   | 3.61128756037628  |
| ENSG00000171100 | MTM1     | 3.64756243261209  |
| ENSG00000115738 | ID2      | 3.65826081117459  |
| ENSG00000166974 | MAPRE2   | 3.70182338104162  |
| ENSG00000116871 | MAP7D1   | 3.72334617184995  |
| ENSG00000170549 | IRX1     | 3.73257051343592  |
| ENSG00000169306 | IL1RAPL1 | 3.75386905218784  |
| ENSG00000018625 | ATP1A2   | 3.80897043298757  |
| ENSG00000199102 | MIR302C  | 3.81760280829055  |
| ENSG00000079739 | PGM1     | 3.86540684126316  |
| ENSG00000140455 | USP3     | 3.90725181354598  |
| ENSG00000104267 | CA2      | 3.92493716790639  |
| ENSG00000158966 | CACHD1   | 3.9842574891187   |
| ENSG00000146426 | TIAM2    | 4.00761925460455  |
| ENSG00000117394 | SLC2A1   | 4.05107269727051  |
| ENSG00000177508 | IRX3     | 4.0574188032457   |
| ENSG00000188257 | PLA2G2A  | 4.14547505306511  |
| ENSG00000100314 | CABP7    | 4.17434697846671  |
| ENSG00000165617 | DACT1    | 4.25811170096308  |
| ENSG00000157570 | TSPAN18  | 4.26563756457701  |
| ENSG00000138764 | CCNG2    | 4.2862632491678   |
| ENSG00000079215 | SLC1A3   | 4.33470659238981  |
| ENSG00000103710 | RASL12   | 4.43018307882895  |
| ENSG00000113916 | BCL6     | 4.70189991851954  |
| ENSG00000022267 | FHL1     | 4.728215674998    |
| ENSG00000126822 | PLEKHG3  | 4.78526555497771  |
| ENSG00000170561 | IRX2     | 4.81391170337348  |
| ENSG00000134569 | LRP4     | 4.8704608689237   |
| ENSG00000110675 | ELMOD1   | 4.88908144562804  |
| ENSG00000137193 | PIM1     | 4.99770222860548  |
| ENSG00000071575 | TRIB2    | 5.00432385531391  |
| ENSG00000101384 | JAG1     | 5.01362883735314  |
| ENSG00000090776 | EFNB1    | 5.02633193962582  |
| ENSG00000169071 | ROR2     | 5.4560709192239   |
| ENSG00000176842 | IRX5     | 5.58956840068819  |
| ENSG00000127863 | TNFRSF19 | 5.65567356152472  |

|                 |        |                  |
|-----------------|--------|------------------|
| ENSG00000134363 | FST    | 5.78598409986394 |
| ENSG00000262655 | SPON1  | 5.81420604714459 |
| ENSG00000115290 | GRB14  | 6.49415569572562 |
| ENSG00000100767 | PAPLN  | 6.57383963292784 |
| ENSG00000175352 | NRIP3  | 6.73567882345321 |
| ENSG00000137267 | TUBB2A | 6.77033643297005 |
| ENSG00000168646 | AXIN2  | 6.77759262595111 |
| ENSG00000143878 | RHOB   | 7.01401690969806 |
| ENSG00000136205 | TNS3   | 7.07831021322305 |
| ENSG00000174498 | IGDCC3 | 7.23243121251923 |
| ENSG00000173320 | STOX2  | 7.27395256432328 |
| ENSG00000197587 | DMBX1  | 7.51839630501491 |
| ENSG00000184144 | CNTN2  | 8.35277558864278 |
| ENSG00000171724 | VAT1L  | 9.07115336213258 |
| ENSG00000128683 | GAD1   | 9.13522059983478 |
| ENSG00000125492 | BARHL1 | 9.27819453247737 |
| ENSG00000204335 | SP5    | 11.8446495530989 |
